# Supplementary material
Source: PubMed Central journal article supplement (PMC2781663)

## SUPPLEMENTARY DATA

### EXPERIMENTAL PROCEDURES

After incubation for 24 hours with dexamethasone at 1  $\mu\text{M}$ , U373 MG cells were fixed, stained with propidium iodide and analysed flow cytometrically for cell cycle distribution (Telford, Cell Prolif, 1991). Apoptotic thymocytes were used as control.

### RESULTS

In the control cells, we observed a distinct subpopulation of cells below the G0/G1 region (hypodiploid peak) consistent with the presence of internucleosomal DNA fragments induced by apoptosis. In the U373 MG cells treated with dexamethasone at 1  $\mu\text{M}$  and 10  $\mu\text{M}$ , we did not observe any hypodiploid peak, confirming that dexamethasone at 1  $\mu\text{M}$  and 10  $\mu\text{M}$  does not induce apoptosis in the U373 G cells.

### FIGURE LEGEND

Effects of dexamethasone on apoptosis of U373 MG cells. Apoptosis was assessed by propidium iodide flow cytometry. In the control thymocytes (*A*), we observed a distinct subpopulation of cells below the G0/G1 region (hypodiploid peak, arrow) consistent with the presence of internucleosomal DNA fragments induced by apoptosis. In resting (*B*) and dexamethasone-treated (1  $\mu\text{M}$  in *C* and 10  $\mu\text{M}$  in *D*) U373 MG cells, we did not observe any hypodiploid peak, confirming that dexamethasone at 1  $\mu\text{M}$  and 10  $\mu\text{M}$  does not induce apoptosis in the U373 G cells.

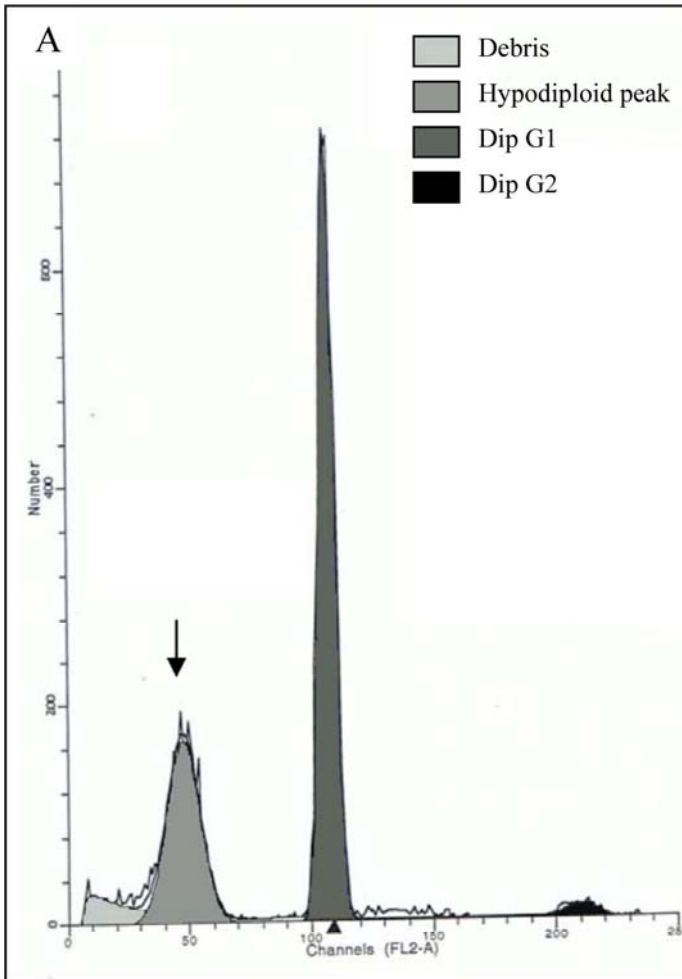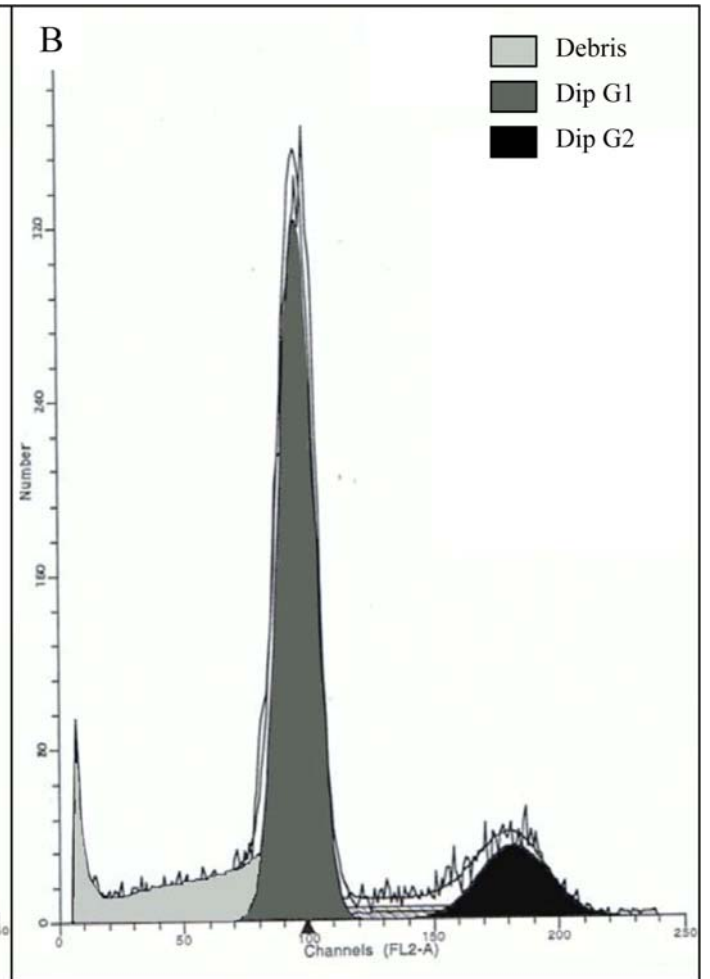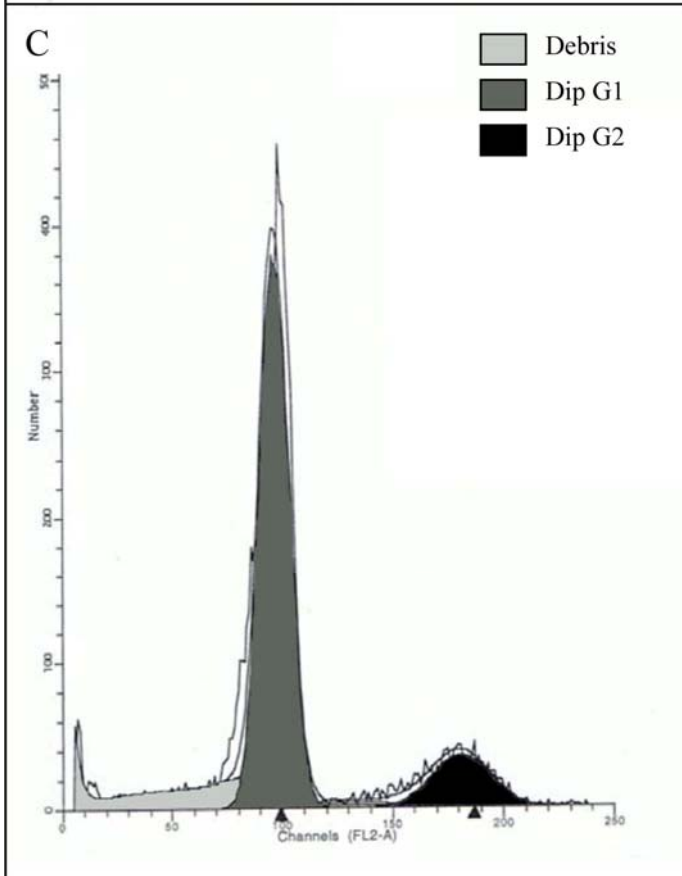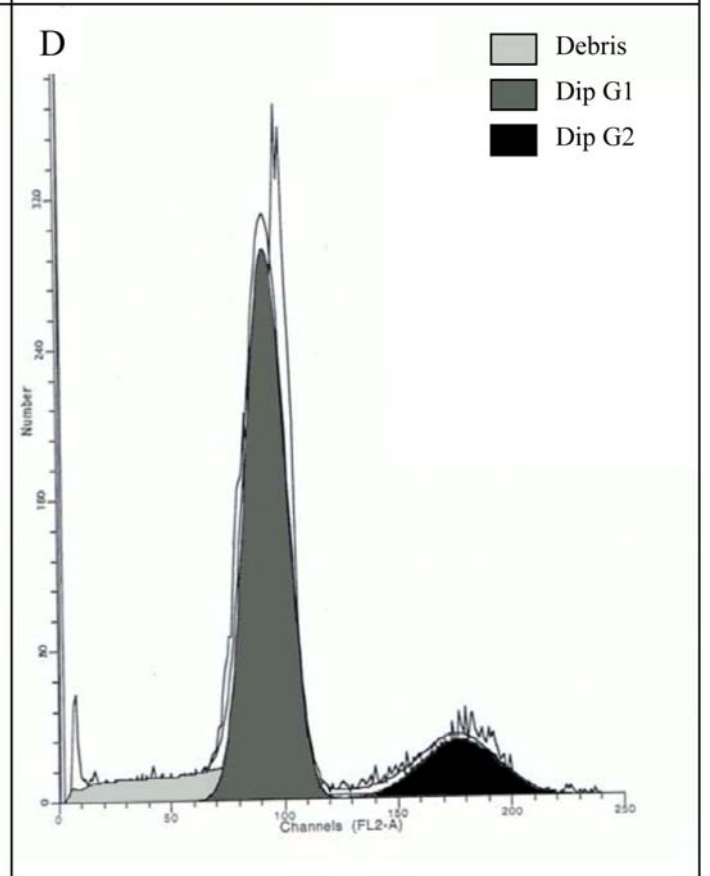

Supplement: supp_M109.014589_jbc.M109.014589-1.pdf [file supp_M109.014589_jbc.M109.014589-1.pdf]
